# Supplementary material
Source: PubMed Central journal article supplement (PMC5623141)

## Supplemental Figure Legends

### **Figure S1: Enteric glial elimination in $Plp1^{CreER};Rosa26^{DTA}$ mice is dependent on the presence of both Cre recombinase and tamoxifen.**

(A-D) Neurofilament-H (NF-H) and S100 $\beta$  immunoreactivities in the colons of  $Rosa26^{DTA}$  ( $Cre^{-}$ , control) and  $Plp1^{CreER};Rosa26^{DTA}$  mice ( $Cre^{+}$ , experimental), imaged at focal plane of the myenteric plexus. Glial loss is Cre-dependent.

(E-F) NF-H and S100 $\beta$  immunoreactivities in the colon of  $Plp1^{CreER};Rosa26^{DTA}$  mice ( $Cre^{+}$ ) imaged at focal plane of the myenteric plexus. There is no glial loss in  $Cre^{+}$  mice in the absence of tamoxifen treatment. Scale bar = 50 $\mu$ m

### **Figure S2: Enteric glial elimination in $Plp1^{CreER};Rosa26^{DTA}$ mice does not cause histological evidence of intestinal inflammation.**

Hematoxylin and eosin stained cross-sections of duodenum, ilea and colons from  $Cre^{-}$  (control) and  $Cre^{+}$  (glial-ablated) mice at 7, 11 and 14 days post-tamoxifen treatment (dpt) reveal no evidence of inflammation. Representative images from at least 4-5 mice examined per condition.

### **Figure S3: Valganciclovir treatment of $GFAP^{HSV-TK}$ mice leads to extensive injury to non-targeted cells; this non-specific toxicity is not observed in $Plp1^{CreER};Rosa26^{DTA}$ mice.**

(A-B) HSV-TK and phosphorylated histone 2AX (pH2AX) immunoreactivities imaged at the level of the myenteric plexus in ilea from  $TK^{-}$  (A) and  $TK^{+}$  (B) mice treated with valganciclovir (VGCV). Neither HSV-TK, nor pH2AX immunoreactivities are evident in control tissue (A); however, abundant transgene expression (magenta) and apoptosis (green) can be seen in the experimental  $TK^{+}$  mouse tissue (B). Although many of the apoptotic cells display simultaneous transgene expression, some apoptotic cells express only pH2AX (arrows) suggesting that toxicity is not limited to transgene-expressing cells. Nuclei counterstained with TO-PRO3 (blue). Scale bar = 50 $\mu$ m

(C-D) The ultrastructure of bundles of nerve fibers in interganglionic connectives from the small intestines of VGCV-treated  $TK^{-}$  (C) and  $TK^{+}$  (D) mice. Note that the glial sheath completely envelops the connective in the control preparation (C), partitions groups of axons, and maintains a tightly packed order among the axons. Following glial ablation (D) the perineuronal glial sheath is deficient, gaps appear within the connective, the order of the connective is disrupted, and many axons are in direct contact with the

surrounding connective tissue. Some of the neurites (arrows) appear to be vacuolated and the cytoplasm of some axons is increased in electron density (\*). Scale bars = 500 nm

(E-F) Phosphorylated histone 2AX (pH2AX) immunoreactivity does not differ in the ilea of Rosa26<sup>DTA</sup> (Cre<sup>-</sup>, control) and Plp1<sup>CreER</sup>;Rosa26<sup>DTA</sup> mice (Cre<sup>+</sup>, experimental). Nuclei are counterstained with DAPI. Scale bar = 50µm

**Supplemental Table 1: Mouse Lines**

| <b>Mouse Line</b>          | <b>JAX Stock</b> | <b>Reference</b>                                                                                                                                                                                  |
|----------------------------|------------------|---------------------------------------------------------------------------------------------------------------------------------------------------------------------------------------------------|
| Plp1 <sup>CreER</sup>      | 005975           | Doerflinger NH, Macklin WB, Popko B. Inducible site-specific recombination in myelinating cells. <i>Genesis</i> 2003;35:63-72.                                                                    |
| Rosa26 <sup>DTA</sup>      | 009669           | Voehringer D, Liang HE, Locksley RM. Homeostasis and effector function of lymphopenia-induced "memory-like" T cells in constitutively T cell-depleted mice. <i>J Immunology</i> 2008;180:4742-53. |
| Gfap <sup>CreER</sup>      | N/A              | Casper KB, Jones K, McCarthy KD. Characterization of astrocyte-specific conditional knockouts. <i>Genesis</i> 2007;45:292-9.                                                                      |
| Rosa26 <sup>TdTomato</sup> | 007909           | Madisen L, Zwingman TA, Sunkin SM, et al. A robust and high-throughput Cre reporting and characterization system for the whole mouse brain. <i>Nature Neuroscience</i> 2010;13:133-40.            |
| Rosa26 <sup>LacZ</sup>     | 003474           | Soriano P. Generalized lacZ expression with the ROSA26 Cre reporter strain. <i>Nature Genetics</i> 1999;21:70-1.                                                                                  |
| Gfap <sup>Cre</sup>        | 012886           | Garcia AD, Doan NB, Imura T, et al. GFAP-expressing progenitors are the principal source of constitutive neurogenesis in adult mouse forebrain. <i>Nature Neuroscience</i> 2004;7:1233-41.        |
| Gfap <sup>HSV-TK</sup>     | 005698           | Bush TG, Savidge TC, Freeman TC, et al. Fulminant jejuno-ileitis following ablation of enteric glia in adult transgenic mice. <i>Cell</i> 1998;93:189-201.                                        |

N/A: Not applicable

**Supplemental Table 2: Primary Antibodies**

| <b>Antibody</b>          | <b>Vendor</b>  | <b>Catalogue Number</b> | <b>Dilution</b> |
|--------------------------|----------------|-------------------------|-----------------|
| Chicken anti-NFH         | Millipore      | AB5539                  | 1:2500          |
| Rabbit anti-S100 $\beta$ | DAKO           | Z0311                   | 1:500           |
| Rabbit anti-Ki67         | Abcam          | ab15580                 | 1:1000          |
| Goat anti-HSV1 TK        | Santa Cruz     | sc-28038                | 1:200           |
| Rabbit anti-GFAP         | Sigma          | G9269                   | 1:1000          |
| Chicken anti-GFAP        | Millipore      | AB5541                  | 1:1000          |
| Human anti-ANNA-1        | Mayo Clinic    | Gift from V. Lennon     | 1:40,000        |
| Rabbit anti-PH2A.X       | Cell Signaling | 9718P                   | 1:200           |
| Rabbit anti-nNOS         | ImmunoStar     | 24287                   | 1:1500          |
| Rabbit anti PGP9.5       | Cedarlane      | CL95101                 | 1:1000          |
| Rabbit anti-ZO-1         | Invitrogen     | 61-7300                 | 1:100           |
| Rat anti-E-cadherin      | Invitrogen     | 13-1900                 | 1:100           |
| Goat anti-SCFR           | R&D Systems    | AF1356                  | 1:500           |

**Supplemental Table 3: Previous studies of enteric glial disruption in mice**

| <b>Epithelial function</b>                                                                                                    |                                                                                                                                                                                                                                                                                                                                                  |                  |
|-------------------------------------------------------------------------------------------------------------------------------|--------------------------------------------------------------------------------------------------------------------------------------------------------------------------------------------------------------------------------------------------------------------------------------------------------------------------------------------------|------------------|
| <b>Approach</b>                                                                                                               | <b>Phenotype</b>                                                                                                                                                                                                                                                                                                                                 | <b>Reference</b> |
| Chemical: Gliotoxin 6-aminonicotinamide                                                                                       | Ultrastructure of colonic epithelium was normal in mice treated with 6-aminonicotinamide.                                                                                                                                                                                                                                                        | 1                |
| Chemical: Gliotoxin fluorocitrate reversibly disrupts glial glucose uptake                                                    | No histological evidence of inflammation in wildtype mice treated with fluorocitrate for 7 days. Colonic epithelial permeability measured in Ussing chambers was not different between vehicle and fluorocitrate-treated mice.                                                                                                                   | 2                |
| Genetic: Acute ablation of expression of connexin-43, a gap junction protein, in Sox10-expressing cells                       | Colonic epithelial permeability was measured in Ussing chambers, and was not different between control and conditional knock-out mice.                                                                                                                                                                                                           | 3                |
| Chemogenetic: Activation of DREADDs [designer receptors exclusively activated by designer drugs] within GFAP-expressing cells | Colonic epithelial permeability was measured in Ussing chambers, and was not different upon CNO (DREADD ligand) treatment between DREADD-expressing mice and control mice.                                                                                                                                                                       | 3                |
| <b>GI motility</b>                                                                                                            |                                                                                                                                                                                                                                                                                                                                                  |                  |
| <b>Approach</b>                                                                                                               | <b>Phenotype</b>                                                                                                                                                                                                                                                                                                                                 | <b>Reference</b> |
| Chemical: Gliotoxin 6-aminonicotinamide                                                                                       | Mice treated with 6-aminonicotinamide developed diarrhea. Transit time was not measured. Ultrastructure of enteric neurons was normal.                                                                                                                                                                                                           | 1                |
| Chemical: Gliotoxin fluorocitrate                                                                                             | Small intestinal motility was slowed in fluorocitrate-treated mice relative to controls. Colonic bead expulsion time was unchanged.                                                                                                                                                                                                              | 2                |
| Genetic: Acute ablation of connexin-43 in GFAP-expressing cells                                                               | Total GI transit time and 1 hour fecal pellet production were not different between control and conditional knock-out mice. Colonic bead expulsion was slower in conditional knock-outs.                                                                                                                                                         | 4                |
| Chemogenetic: Activation of DREADDs within GFAP-expressing cells                                                              | Transgenic DREADD mice and wildtype control mice were treated with the ligand CNO, and GI motility was measured. Total GI transit time and upper GI transit were not different, but 1 hour fecal pellet production increased and colonic bead expulsion was faster. <i>Ex vivo</i> , CMMC frequency, speed and amplitude all increased slightly. | 5                |

**Relevant References:**

1. Aikawa H, Suzuki K. Enteric gliopathy in niacin-deficiency induced by CNS gliotoxin. *Brain Res* 1985;334:354-6.
2. Nasser Y, Fernandez E, Keenan CM, et al. Role of enteric glia in intestinal physiology: effects of the gliotoxin fluorocitrate on motor and secretory function. *Am J Physiol Gastrointest Liver Physiol* 2006;291:G912-27.
3. Grubisic V, Gulbransen BD. Enteric glial activity regulates secretomotor function in the mouse colon but does not acutely affect gut permeability. *J Physiol* 2017.
4. McClain JL, Grubisic V, Fried D, et al. Ca<sup>2+</sup> responses in enteric glia are mediated by connexin-43 hemichannels and modulate colonic transit in mice. *Gastroenterology* 2014;146:497-507 e1.
5. McClain JL, Fried DE, Gulbransen BD. Agonist-evoked Ca<sup>2+</sup> signaling in enteric glia drives neural programs that regulate intestinal motility in mice. *Cell Mol Gastroenterol Hepatol* 2015;1:631-645.

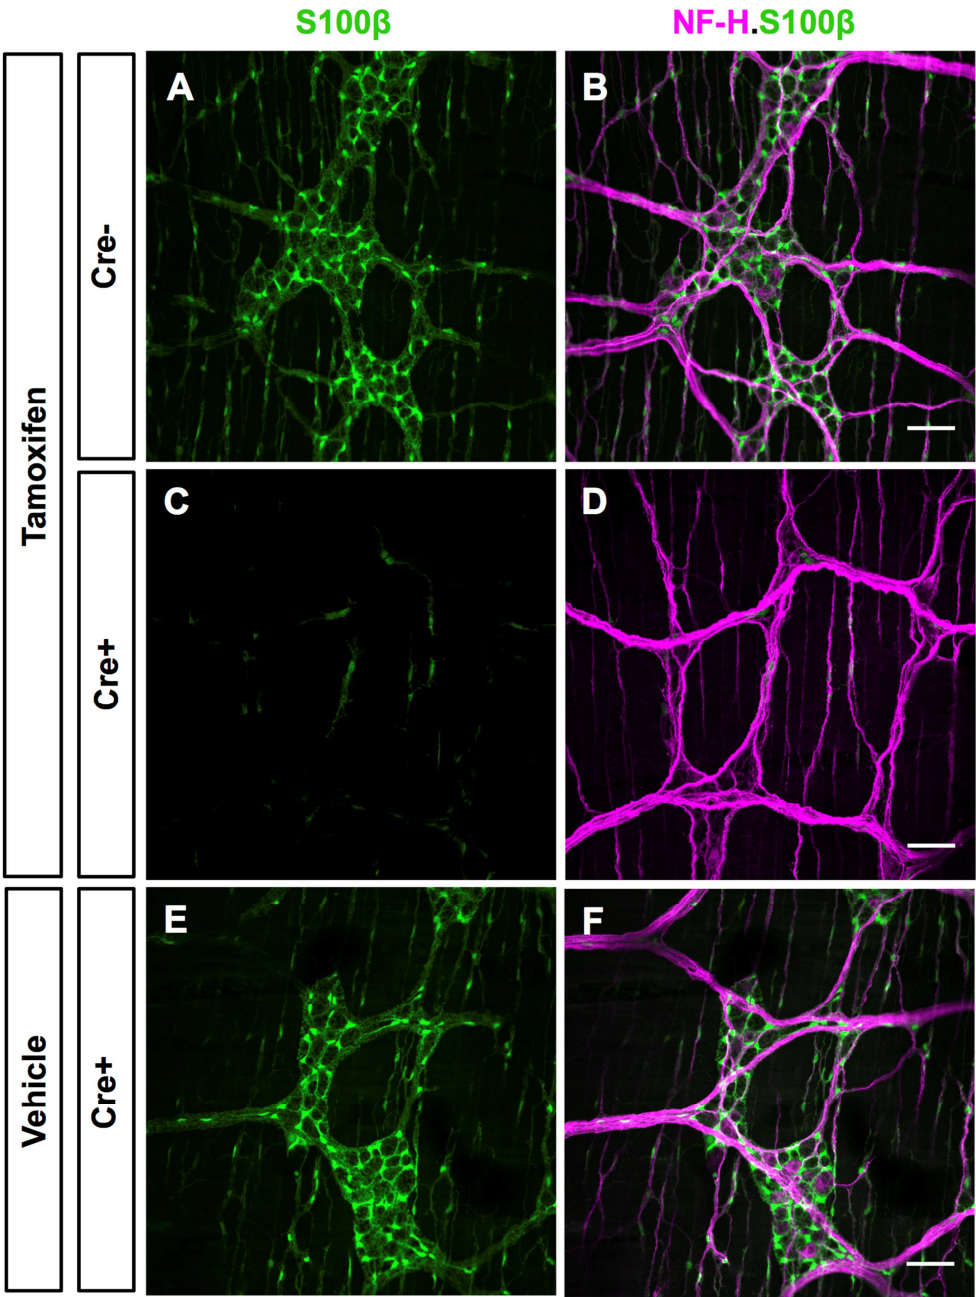

|       |      | Duodenum                                                                            | Ileum                                                                               | Colon                                                                                |
|-------|------|-------------------------------------------------------------------------------------|-------------------------------------------------------------------------------------|--------------------------------------------------------------------------------------|
| 7dpt  | Cre- | 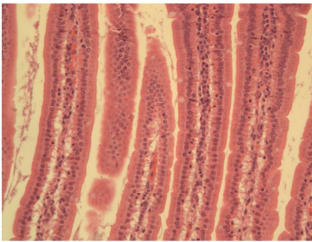   | 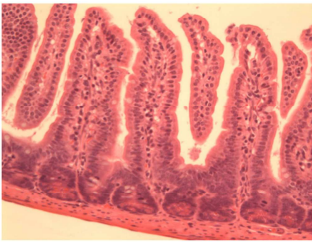   | 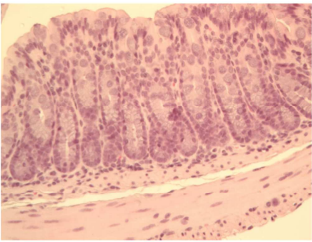   |
|       | Cre+ | 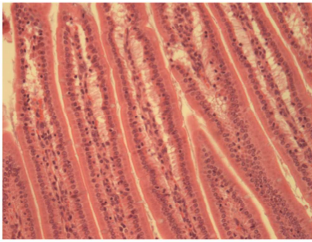   | 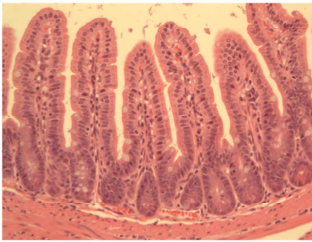   | 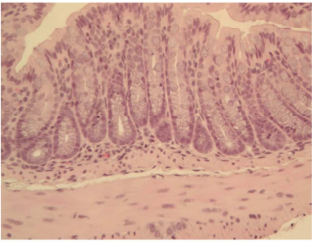   |
| 11dpt | Cre- | 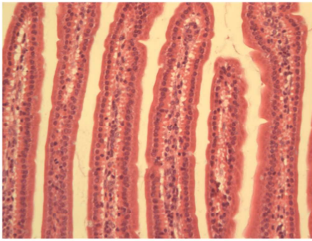  | 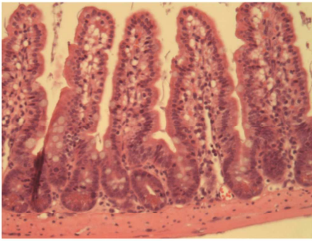  | 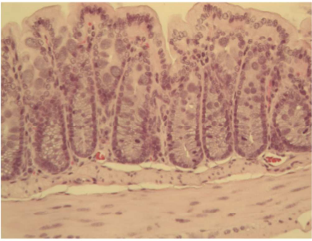  |
|       | Cre+ | 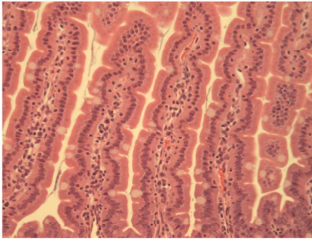 | 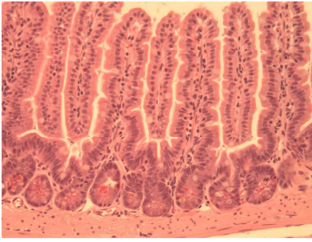 | 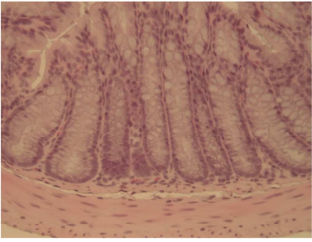 |
| 14dpt | Cre- | 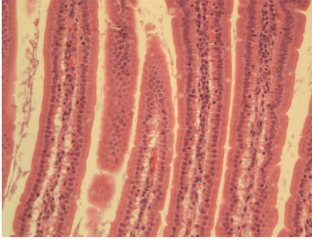 | 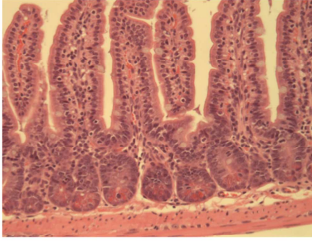 | 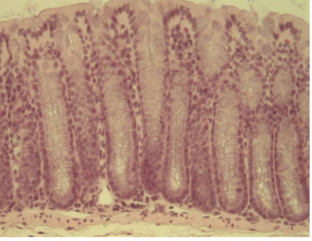 |
|       | Cre+ | 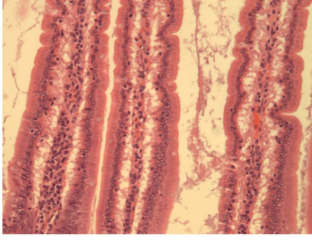 | 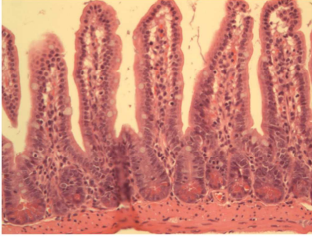 | 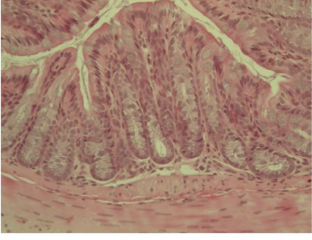 |

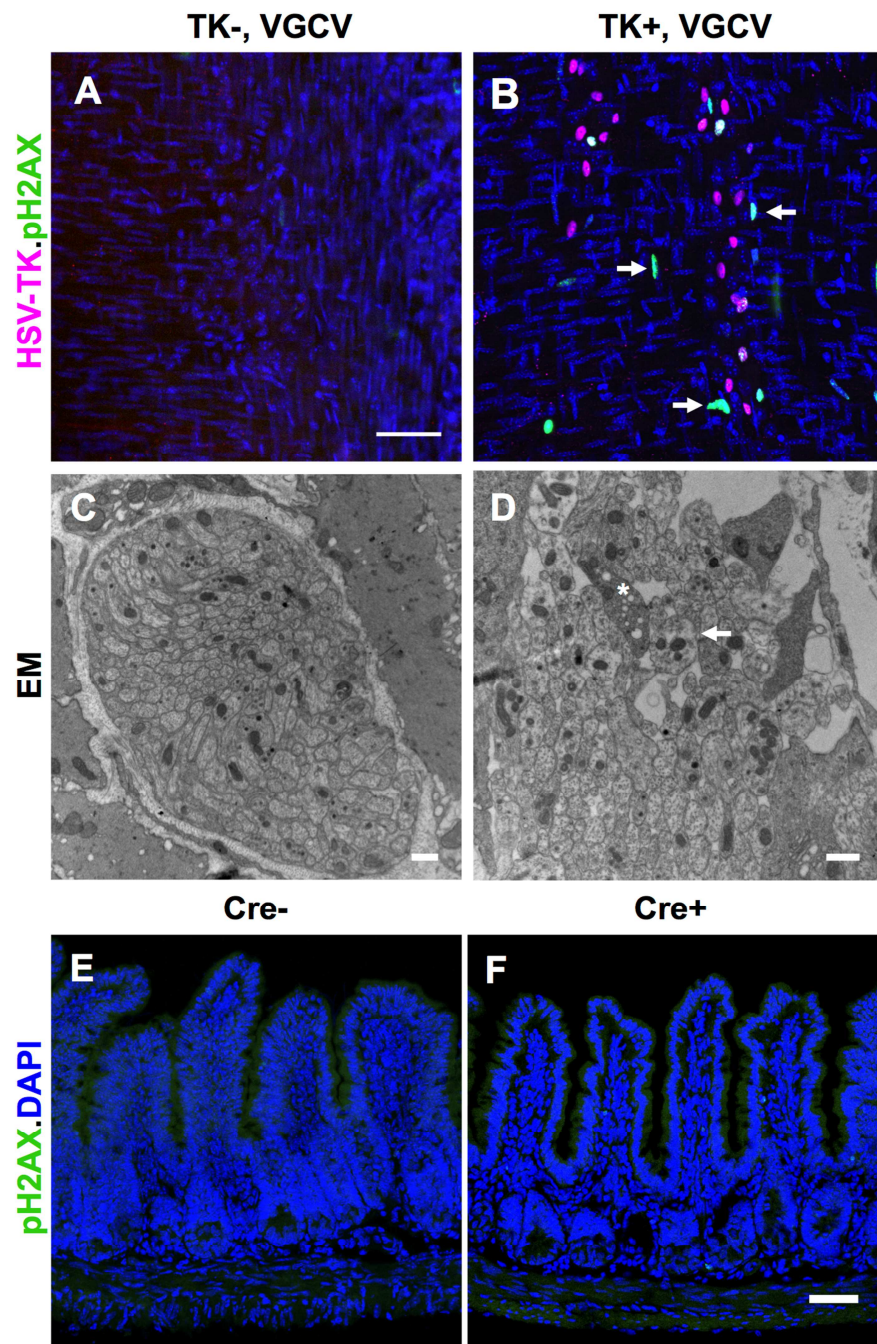

Supplement: NIHMS892390-supplement-supplement_1.pdf [file NIHMS892390-supplement-supplement_1.pdf]
